# Supplementary material for: Dual role of 2-tosylaminomethylaniline as a ligand and a nucleophile in the copper-mediated oxidation of methanol
Source: Royal Society of Chemistry journal article supplement (doi:10.1039/c3dt52460d), 2013-10-02
Supplement: c3dt52460d.pdf [file c3dt52460d.pdf]

Electronic Supporting Information for:

## Dual Role of 2-tosylaminomethylaniline as Ligand and Nucleophile in the Copper-mediated Oxidation of Methanol

*Jesus Sanmartín-Matalobos,<sup>\*</sup> Ana M. García-Deibe, Lucía Briones-Miguéns, Concepcion González-Bello, Cristina Portela-García and Matilde Fondo*

[jesus.sanmartin@usc.es](mailto:jesus.sanmartin@usc.es)

---

Table of Contents:

|                                                                               |    |
|-------------------------------------------------------------------------------|----|
| 1. View of the molecular ion peak of non-isotopic labelled <b>1</b>           | S2 |
| 2. FT-IR spectrum of non-isotopic labelled <b>1</b>                           | S3 |
| 3. <sup>13</sup> C NMR spectrum of non-isotopic labelled <b>1</b>             | S4 |
| 4. <sup>13</sup> C NMR spectrum of <sup>13</sup> C-isotopic labelled <b>1</b> | S4 |

---

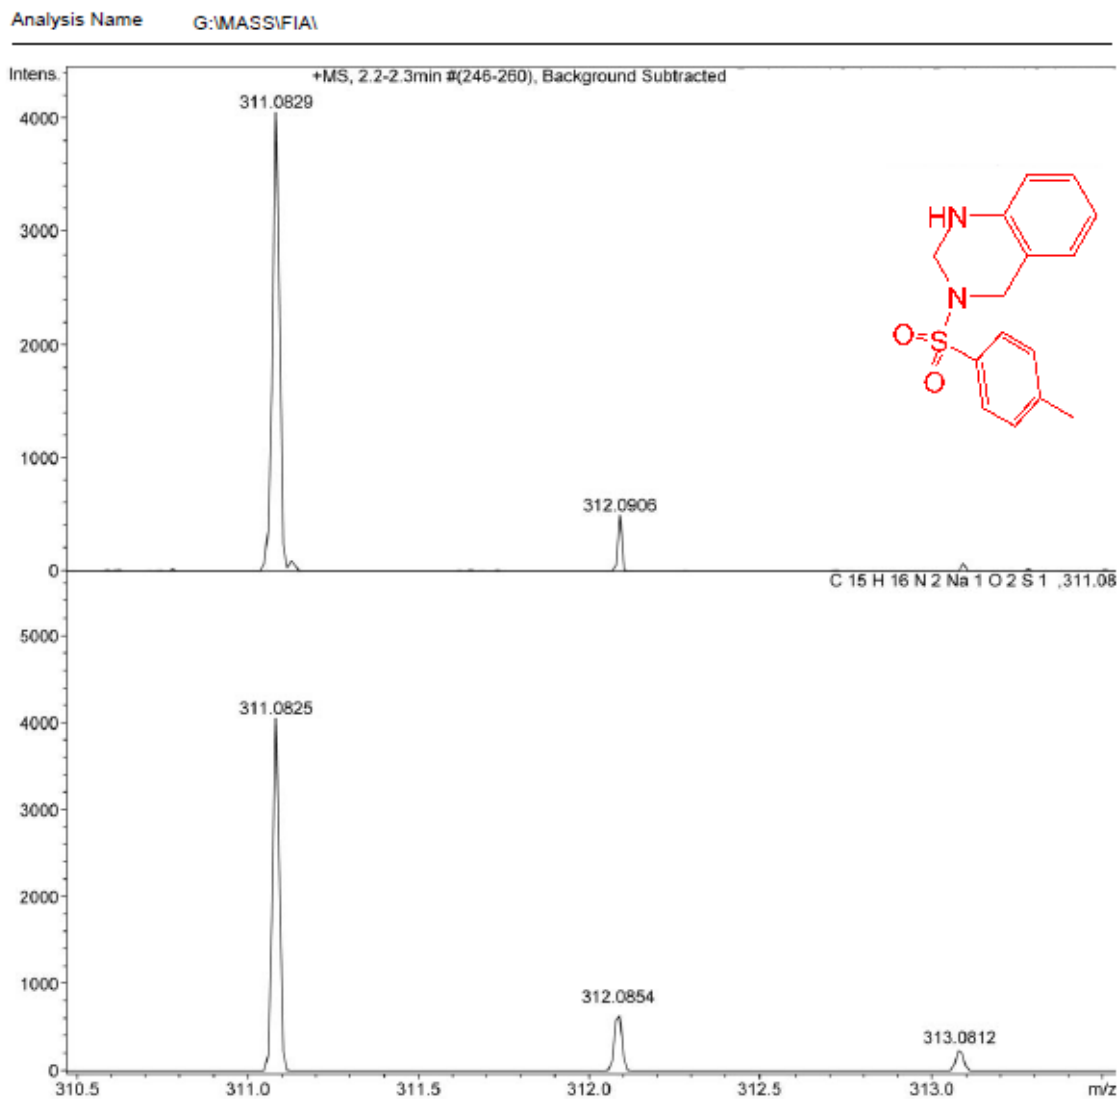

Fig. S1. View of the molecular ion peak of non-isotopic labelled **1**. HRMS found: 311.0829  $m/z$   $[M+Na]^+$  (top) and calculated for  $C_{15}H_{16}N_2NaO_2S$ : 311.0825 (bottom).

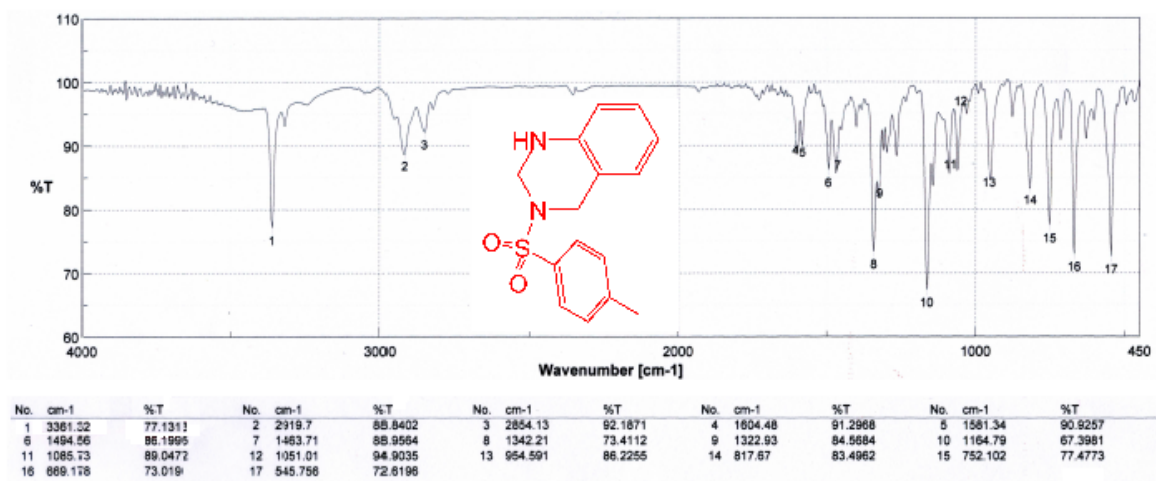

Fig. S2. FT-IR spectrum of non-isotopic labelled 1.

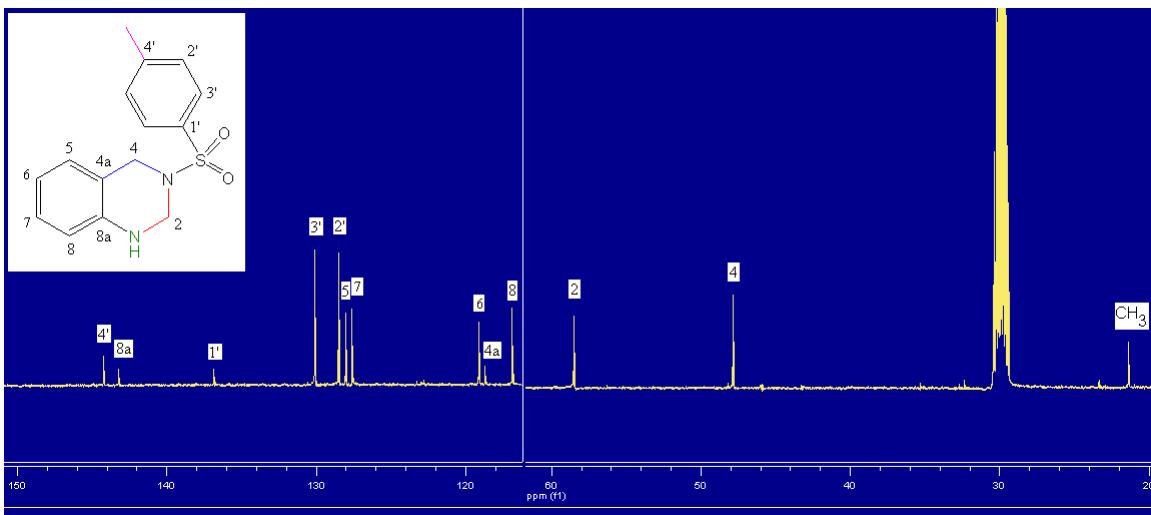

Fig. S3.  $^{13}\text{C}$  NMR spectrum of non-isotopically labelled **1**.

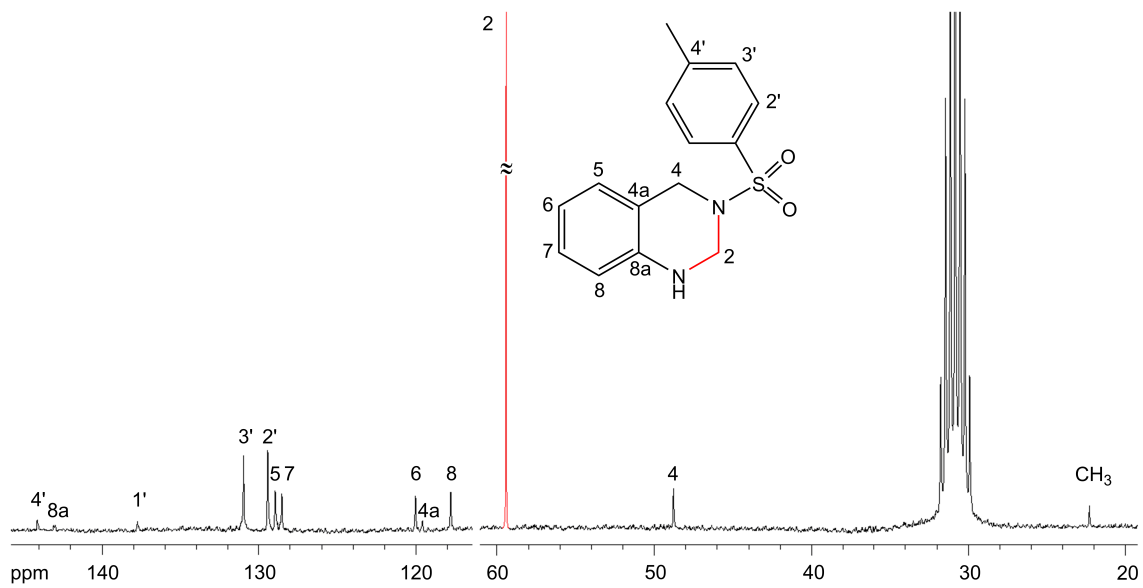

Fig. S4.  $^{13}\text{C}$  NMR spectrum of  $\text{C}^{13}$ -isotopically labelled **1**.
